# Supplementary material for: Birds Generally Carry a Small Repertoire of Bitter Taste Receptor Genes
Source: PubMed Central journal article supplement (PMC4607536; doi:10.1093/gbe/evv180), 2015-09-04

Supplementary Information for

**Birds generally carry a small repertoire of bitter taste receptor genes**

**Authors:**

Kai Wang, and Huabin Zhao\* (E-mail: [huabinzhao@whu.edu.cn](mailto:huabinzhao@whu.edu.cn))

**Affiliation:**

Department of Ecology, College of Life Sciences, Wuhan University, Wuhan, China

**This PDF file contains:**

Table S1 to S7

Figures S1 to S6

Data set S1

**Table S1.** References of the dietary preferences and genomic contig N50 statistics for the 48 birds studied.

| Species                    | Contig N50 (bp) | Diet        | References *                                                        |
|----------------------------|-----------------|-------------|---------------------------------------------------------------------|
| Rifleman                   | 18K             | Insectivore | Oliver 1955                                                         |
| Golden-collared Manakin    | 34K             | Frugivore   | Worthington 1989                                                    |
| Medium Ground Finch        | 30K             | Granivore   | Scott 1996                                                          |
| American Crow              | 24K             | Omnivore    | <a href="http://animaldiversity.org">http://animaldiversity.org</a> |
| Zebra Finch                | 38K             | Granivore   | <a href="http://animaldiversity.org">http://animaldiversity.org</a> |
| Budgerigar                 | 55K             | Granivore   | DeGolier et al. 1999                                                |
| Kea                        | 16K             | Frugivore   | Brejaart 1988                                                       |
| Peregrine Falcon           | 28K             | Carnivore   | <a href="http://animaldiversity.org">http://animaldiversity.org</a> |
| Red-legged Seriema         | 17K             | Carnivore   | del Hoyo et al. 1992                                                |
| Carmine Bee-eater          | 20K             | Insectivore | Hoi et al. 2015                                                     |
| Downy Woodpecker           | 20K             | Insectivore | <a href="http://animaldiversity.org">http://animaldiversity.org</a> |
| Rhinoceros Hornbill        | 14K             | Frugivore   | Kemp and Woodcock. 1995                                             |
| Bar-tailed Trogon          | 19K             | Omnivore    | del Hoyo et al. 1992                                                |
| Cuckoo Roller              | 19K             | Insectivore | del Hoyo et al. 1992                                                |
| Speckled Mousebird         | 18K             | Frugivore   | Roberts et al, 2005                                                 |
| Barn Owl                   | 13K             | Carnivore   | DeGolier et al, 1999                                                |
| White-tailed Eagle         | 20K             | Carnivore   | del Hoyo et al. 1992                                                |
| Bald Eagle                 | 105K            | Carnivore   | <a href="http://animaldiversity.org">http://animaldiversity.org</a> |
| Turkey Vulture             | 12K             | Carnivore   | <a href="http://animaldiversity.org">http://animaldiversity.org</a> |
| Dalmatian Pelican          | 18K             | Carnivore   | del Hoyo et al. 1992                                                |
| Little Egret               | 24K             | Carnivore   | Goutner et al. 1997                                                 |
| Crested Ibis               | 22K             | Carnivore   | del Hoyo et al. 1992                                                |
| Great Cormorant            | 15K             | Carnivore   | <a href="http://animaldiversity.org">http://animaldiversity.org</a> |
| Northern Fulmar            | 17K             | Carnivore   | <a href="http://animaldiversity.org">http://animaldiversity.org</a> |
| Emperor Penguin            | 30K             | Carnivore   | <a href="http://animaldiversity.org">http://animaldiversity.org</a> |
| Adelie Penguin             | 19K             | Carnivore   | <a href="http://animaldiversity.org">http://animaldiversity.org</a> |
| Red-throated Loon          | 16K             | Carnivore   | <a href="http://animaldiversity.org">http://animaldiversity.org</a> |
| White-tailed Tropicbird    | 18K             | Carnivore   | Schreiber. 1991                                                     |
| Sunbittern                 | 16K             | Insectivore | Knowlton. 1909                                                      |
| Killdeer                   | 32K             | Insectivore | DeGolier et al. 1999                                                |
| Grey Crowned Crane         | 18K             | Omnivore    | <a href="http://animaldiversity.org">http://animaldiversity.org</a> |
| Hoatzin                    | 24K             | Folivore    | <a href="http://animaldiversity.org">http://animaldiversity.org</a> |
| Anna's Hummingbird         | 23K             | Nectarivore | DeGolier et al. 1999                                                |
| Chimney Swift              | 28K             | Insectivore | <a href="http://animaldiversity.org">http://animaldiversity.org</a> |
| Chuck-will's-widow         | 22K             | Insectivore | <a href="http://animaldiversity.org">http://animaldiversity.org</a> |
| MacQueen's Bustard         | 18K             | Omnivore    | Perrins. 2009                                                       |
| Red-crested Turaco         | 18K             | Frugivore   | del Hoyo et al. 1992                                                |
| Common Cuckoo              | 31K             | Insectivore | <a href="http://animaldiversity.org">http://animaldiversity.org</a> |
| Brown Mesite               | 18K             | Omnivore    | del Hoyo et al. 1992                                                |
| Yellow-throated Sandgrouse | 26K             | Granivore   | Campbell and Lack. 1985                                             |

|                        |      |           |                                                                     |
|------------------------|------|-----------|---------------------------------------------------------------------|
| Domestic Pigeon        | 22K  | Granivore | DeGolier et al. 1999                                                |
| American Flamingo      | 16K  | Omnivore  | Perrins 2009                                                        |
| Great Crested Grebe    | 13K  | Carnivore | <a href="http://animaldiversity.org">http://animaldiversity.org</a> |
| Turkey                 | 26K  | Omnivore  | DeGolier et al. 1999                                                |
| Chicken                | 279K | Granivore | DeGolier et al. 1999                                                |
| Peking Duck            | 26K  | Granivore | DeGolier et al. 1999                                                |
| White-throated Tinamou | 24K  | Granivore | Perrins 2009                                                        |
| Common Ostrich         | 29K  | Granivore | <a href="http://animaldiversity.org">http://animaldiversity.org</a> |
| Alligator              |      | Carnivore | <a href="http://animaldiversity.org">http://animaldiversity.org</a> |
| Crocodile              |      | Carnivore | <a href="http://animaldiversity.org">http://animaldiversity.org</a> |
| Gharial                |      | Carnivore | <a href="http://animaldiversity.org">http://animaldiversity.org</a> |

\*References cited.

- Brejaart, R. 1988 Diet and feeding behaviour of the kea (*Nestor notabilis*). Lincoln, Lincoln University.
- Campbell, B., Lack, E. & British Ornithologists' Union. 1985 A dictionary of birds. Vermillion, S.D., Published for the British Ornithologists' Union by Buteo Books.
- DeGolier, T.F., Mahoney, S.A. & Duke, G.E. 1999 Relationships of avian cecal lengths to food habits, taxonomic position, and intestinal lengths. *Condor* 101, 622-634.
- del Hoyo, J., Elliott, A., Sargatal, J. & Cabot, J. 1992 Handbook of the birds of the world. Barcelona, Lynx Edicions.
- Goutner, V. & Furness, R.W. 1997 Mercury in feathers of little egret *Egretta garzetta* and night heron *Nycticorax nycticorax* chicks and in their prey in the Axios Delta, Greece. *Arch. Environ. Contam. Toxicol.* 32, 211-216.
- Hoi, H., Kristofik, J. & Darolova, A. 2015 All you can eat: is food supply unlimited in a colonially breeding bird? *Ecol Evol* 5, 450-458.
- Kemp, A.C. & Woodcock, M. 1995 The hornbills: Bucerotiformes. New York, Oxford University Press.
- Knowlton, F.H. & Lucas, F.A. 1909 Birds of the World: A popular account, Holt.
- Oliver, W.R.B. 1955 New Zealand birds. 2nd ed. Wellington, AH & AW Reed.
- Perrins, C.M. 2009 The Princeton encyclopedia of birds. Princeton, N.J., Princeton University Press.
- Roberts, A., Hockey, P.A.R., Dean, W.R.J. & Ryan, P. 2005 Roberts' birds of Southern Africa. 7th ed. Cape Town, Trustees of the John Voelcker Bird Book Fund.
- Schreiber, E.A. 1991 Encyclopaedia of Animals: Birds. London, Merehurst Press.
- Scott, T.A. 1996 Concise encyclopedia biology. Berlin, Walter de Gruyter.
- Worthington, A. 1989 Adaptations for avian frugivory: assimilation efficiency and gut transit time of *Manacus vitellinus* and *Pipra mentalis*. *Oecologia* 80, 381-389.

**Table S2.** All partial *Tas2r* genes identified in this study. Non-overlapping partial genes (shown in bold) in one species with similar orthology are potentially from the same locus with gaps.

| Species/Genome          | Different orthologs                                                                                                   | Non-overlapping <i>Tas2rs</i> potentially from same locus                                  |
|-------------------------|-----------------------------------------------------------------------------------------------------------------------|--------------------------------------------------------------------------------------------|
| Rifleman                | Rifleman_Tas2r5_P<br>Rifleman_Tas2r6_P<br>Rifleman_Tas2r7_P<br>Rifleman_Tas2r8_P                                      | None                                                                                       |
| Golden-collared Manakin | Golden-collared_Manakin_Tas2r7_P<br>Golden-collared_Manakin_Tas2r8_P                                                  | None                                                                                       |
| Medium Ground Finch     | Medium_Ground_Finch_Tas2r9_P<br>Medium_Ground_Finch_Tas2r7_P<br>Medium_Ground_Finch_Tas2r8_P                          | None                                                                                       |
| Carmine Bee-eater       | Carmine_Bee-eater_Tas2r4_P                                                                                            | <b>Carmine_Bee-eater_Tas2r2_P</b><br><b>Carmine_Bee-eater_Tas2r3_P</b>                     |
| Bar-tailed Trogon       | Bar-tailed_Trogon_Tas2r6_P<br>Bar-tailed_Trogon_Tas2r8_P<br>Bar-tailed_Trogon_Tas2r9_P<br>Bar-tailed_Trogon_Tas2r11_P | <b>Bar-tailed_Trogon_Tas2r7_P</b><br><b>Bar-tailed_Trogon_Tas2r10_P</b>                    |
| Speckled Mousebird      | Speckled_Mousebird_Tas2r2_P<br>Speckled_Mousebird_Tas2r3_P<br>Speckled_Mousebird_Tas2r4_P                             | None                                                                                       |
| Anna's Hummingbird      | Hummingbird_Tas2r8_P                                                                                                  | <b>Hummingbird_Tas2r7_P</b><br><b>Hummingbird_Tas2r9_P</b><br><b>Hummingbird_Tas2r10_P</b> |
| Chimney Swift           | None                                                                                                                  | <b>Chimney_Swift_Tas2r6_P</b><br><b>Chimney_Swift_Tas2r5_P</b>                             |
| MacQueen's Bustard      | None                                                                                                                  | <b>MacQueens_Bustard_Tas2r3_P</b><br><b>MacQueens_Bustard_Tas2r4_P</b>                     |
| Peking Duck             | Peking_Duck_Tas2r3_P<br>Peking_Duck_Tas2r4_P                                                                          | None                                                                                       |

**Table S3. Syntenic analysis for partial genes.**

| <b>Species</b>          | <b>Gene name</b>                 | <b>Scaffold</b> | <b>Upstream gene</b>                       | <b>Downstream gene</b>              |
|-------------------------|----------------------------------|-----------------|--------------------------------------------|-------------------------------------|
| Rifleman                | Rifleman_Tas2r5_P                | scaffold12242   | poly N (incomplete sequencing)             | taste receptor type 2 member 9-like |
|                         | Rifleman_Tas2r6_P                | scaffold28229   | NA (No available data due to short contig) | NA                                  |
|                         | Rifleman_Tas2r7_P                | C16332196       | No blast hit                               | NA                                  |
|                         | Rifleman_Tas2r8_P                | scaffold28228   | NA                                         | NA                                  |
| Golden-collared Manakin | Golden-collared_Manakin_Tas2r7_P | scaffold920     | mepirin A subunit alpha                    | NA                                  |
|                         | Golden-collared_Manakin_Tas2r8_P | scaffold2273    | NA                                         | No blast hit                        |
| Medium Ground Finch     | Medium_Ground_Finch_Tas2r9_P     | scaffold1047    | taste receptor type 2 member 40-like       | poly N                              |
|                         | Medium_Ground_Finch_Tas2r7_P     | scaffold4119    | NA                                         | NA                                  |
|                         | Medium_Ground_Finch_Tas2r8_P     | scaffold748     | poly N                                     | No blast hit                        |
| Carmine Bee-eater       | Carmine_Bee-eater_Tas2r2_P       | scaffold19532   | mepirin A subunit alpha                    | NA                                  |
|                         | Carmine_Bee-eater_Tas2r3_P       | scaffold20440   | NA                                         | NA                                  |
|                         | Carmine_Bee-eater_Tas2r4_P       | scaffold41834   | NA                                         | No blast hit                        |
| Bar-tailed Trogon       | Bar-tailed_Trogon_Tas2r6_P       | scaffold6731    | poly N                                     | No blast hit                        |
|                         | Bar-tailed_Trogon_Tas2r7_P       | scaffold2738    | poly N                                     | transposon-derived protein ZK1236.4 |
|                         | Bar-tailed_Trogon_Tas2r8_P       | scaffold23126   | NA                                         | No blast hit                        |
|                         | Bar-tailed_Trogon_Tas2r9_P       | scaffold15085   | NA                                         | poly N                              |
|                         | Bar-tailed_Trogon_Tas2r10_P      | scaffold22121   | poly N                                     | NA                                  |
|                         | Bar-tailed_Trogon_Tas2r11_P      | scaffold41964   | NA                                         | NA                                  |
| Speckled Mousebird      | Speckled_Mousebird_Tas2r2_P      | scaffold37637   | NA                                         | NA                                  |
|                         | Speckled_Mousebird_Tas2r3_P      | scaffold38140   | No blast hit                               | poly N                              |
|                         | Speckled_Mousebird_Tas2r4_P      | scaffold37670   | No blast hit                               | poly N                              |
| Anna's Hummingbird      | Hummingbird_Tas2r7_P             | C10465731       | NA                                         | NA                                  |
|                         | Hummingbird_Tas2r8_P             | C10690480       | NA                                         | NA                                  |

|                    |                            |              |                                |                                          |
|--------------------|----------------------------|--------------|--------------------------------|------------------------------------------|
|                    | Hummingbird_Tas2r9_P       | C10499692    | NA                             | NA                                       |
|                    | Hummingbird_Tas2r10_P      | C10429533    | NA                             | NA                                       |
| Chimney Swift      | Chimney_Swift_Tas2r6_P     | scaffold99   | Taste receptor type 2 member 9 | poly N                                   |
|                    | Chimney_Swift_Tas2r5_P     | scaffold46   | poly N                         | transposon-derived protein ZK1236.4      |
| MacQueen's Bustard | MacQueens_Bustard_Tas2r3_P | C15284394    | NA                             | NA                                       |
|                    | MacQueens_Bustard_Tas2r4_P | C15304738    | No blast hit                   | NA                                       |
| Peking Duck        | Peking_Duck_Tas2r3_P       | C18799681    | NA                             | NA                                       |
|                    | Peking_Duck_Tas2r4_P       | scaffold2869 | NA                             | ankyrin repeat domain-containing protein |

---

**Table S4.** *Tas2r* gene repertoires of 48 birds and three crocodylians examined.

| Order                     | Common name                | Species name                    | Diet*       | Number of <i>Tas2r</i> genes |         |        |       |
|---------------------------|----------------------------|---------------------------------|-------------|------------------------------|---------|--------|-------|
|                           |                            |                                 |             | Intact                       | Partial | Pseudo | Total |
| <b>Passeriformes</b>      | Rifleman                   | <i>Acanthisitta chloris</i>     | Insectivore | 4                            | 4       | 1      | 9     |
|                           | Golden-collared Manakin    | <i>Manacus vitellinus</i>       | Frugivore   | 6                            | 2       | 1      | 9     |
|                           | Medium Ground Finch        | <i>Geospiza fortis</i>          | Granivore   | 6                            | 3       | 2      | 11    |
|                           | American Crow              | <i>Corvus brachyrhynchos</i>    | Omnivore    | 7                            | 1       | 2      | 10    |
| <b>Psittaciformes</b>     | Zebra Finch                | <i>Taeniopygia guttata</i>      | Granivore   | 7                            | 0       | 1      | 8     |
|                           | Budgerigar                 | <i>Melopsittacus undulatus</i>  | Granivore   | 1                            | 0       | 1      | 2     |
|                           | Kea                        | <i>Nestor notabilis</i>         | Frugivore   | 1                            | 0       | 1      | 2     |
| <b>Falconiformes</b>      | Peregrine Falcon           | <i>Falco peregrinus</i>         | Carnivore   | 2                            | 0       | 0      | 2     |
| <b>Cariamiformes</b>      | Red-legged Seriema         | <i>Cariama cristata</i>         | Omnivore    | 2                            | 0       | 0      | 2     |
| <b>Coraciiformes</b>      | Carmine Bee-eater          | <i>Merops nubicus</i>           | Insectivore | 1                            | 2       | 0      | 3     |
| <b>Piciformes</b>         | Downy Woodpecker           | <i>Picoides pubescens</i>       | Insectivore | 4                            | 0       | 1      | 5     |
| <b>Bucerotiformes</b>     | Rhinoceros Hornbill        | <i>Buceros rhinoceros</i>       | Frugivore   | 1                            | 1       | 1      | 3     |
| <b>Trogoniformes</b>      | Bar-tailed Trogon          | <i>Apaloderma vittatum</i>      | Omnivore    | 5                            | 5       | 2      | 12    |
| <b>Leptosomiformes</b>    | Cuckoo Roller              | <i>Leptosomus discolor</i>      | Insectivore | 2                            | 0       | 0      | 2     |
| <b>Coliiformes</b>        | Speckled Mousebird         | <i>Colius striatus</i>          | Frugivore   | 1                            | 3       | 0      | 4     |
| <b>Strigiformes</b>       | Barn Owl                   | <i>Tyto alba</i>                | Carnivore   | 2                            | 0       | 0      | 2     |
| <b>Accipitriformes</b>    | White-tailed Eagle         | <i>Haliaeetus albicilla</i>     | Carnivore   | 2                            | 0       | 1      | 3     |
|                           | Bald Eagle                 | <i>Haliaeetus leucocephalus</i> | Carnivore   | 2                            | 0       | 1      | 3     |
|                           | Turkey Vulture             | <i>Cathartes aura</i>           | Carnivore   | 2                            | 0       | 1      | 3     |
| <b>Pelecaniformes</b>     | Dalmatian Pelican          | <i>Pelecanus crispus</i>        | Carnivore   | 1                            | 0       | 1      | 2     |
|                           | Little Egret               | <i>Egretta garzetta</i>         | Carnivore   | 2                            | 0       | 1      | 3     |
|                           | Crested Ibis               | <i>Nipponia nippon</i>          | Carnivore   | 2                            | 0       | 0      | 2     |
|                           | Great Cormorant            | <i>Phalacrocorax carbo</i>      | Carnivore   | 1                            | 0       | 1      | 2     |
| <b>Procellariiformes</b>  | Northern Fulmar            | <i>Fulmarus glacialis</i>       | Carnivore   | 2                            | 0       | 0      | 2     |
| <b>Sphenisciformes</b>    | Emperor Penguin            | <i>Aptenodytes forsteri</i>     | Carnivore   | 0                            | 0       | 3      | 3     |
|                           | Adelie Penguin             | <i>Pygoscelis adeliae</i>       | Carnivore   | 0                            | 0       | 3      | 3     |
| <b>Gaviiformes</b>        | Red-throated Loon          | <i>Gavia stellata</i>           | Carnivore   | 0                            | 0       | 3      | 3     |
| <b>Phaethontiformes</b>   | White-tailed Tropicbird    | <i>Phaethon lepturus</i>        | Carnivore   | 1                            | 0       | 1      | 2     |
| <b>Eurypygiformes</b>     | Sunbittern                 | <i>Eurypyga helias</i>          | Insectivore | 2                            | 0       | 0      | 2     |
| <b>Charadriiformes</b>    | Killdeer                   | <i>Charadrius vociferus</i>     | Insectivore | 3                            | 0       | 0      | 3     |
| <b>Gruiformes</b>         | Grey Crowned Crane         | <i>Balearica regulorum</i>      | Omnivore    | 2                            | 0       | 1      | 3     |
| <b>Opisthocomiformes</b>  | Hoatzin                    | <i>Opisthocomus hoazin</i>      | Folivores   | 4                            | 0       | 0      | 4     |
| <b>Caprimulgiformes</b>   | Anna's Hummingbird         | <i>Calypte anna</i>             | Nectarivore | 6                            | 2       | 2      | 10    |
|                           | Chimney Swift              | <i>Chaetura pelagica</i>        | Insectivore | 4                            | 1       | 0      | 5     |
|                           | Chuck-will's-widow         | <i>Caprimulgus carolinensis</i> | Insectivore | 3                            | 0       | 0      | 3     |
| <b>Otidiformes</b>        | MacQueen's Bustard         | <i>Chlamydotis macqueenii</i>   | Omnivore    | 2                            | 1       | 0      | 3     |
| <b>Musophagiformes</b>    | Red-crested Turaco         | <i>Tauraco erythrolophus</i>    | Frugivore   | 3                            | 0       | 0      | 3     |
| <b>Cuculiformes</b>       | Common Cuckoo              | <i>Cuculus canorus</i>          | Insectivore | 2                            | 1       | 0      | 3     |
| <b>Mesitornithiformes</b> | Brown Mesite               | <i>Mesitornis unicolor</i>      | Omnivore    | 3                            | 0       | 0      | 3     |
| <b>Pterocliiformes</b>    | Yellow-throated Sandgrouse | <i>Pterocles gutturalis</i>     | Granivore   | 1                            | 0       | 2      | 3     |
| <b>Columbiformes</b>      | Domestic Pigeon            | <i>Columba livia</i>            | Granivore   | 1                            | 0       | 0      | 1     |

|                            |                        |                                   |           |   |   |   |    |
|----------------------------|------------------------|-----------------------------------|-----------|---|---|---|----|
| <b>Phoenicopteriformes</b> | American Flamingo      | <i>Phoenicopterus ruber</i>       | Omnivore  | 2 | 0 | 0 | 2  |
| <b>Podicipediformes</b>    | Great Crested Grebe    | <i>Podiceps cristatus</i>         | Carnivore | 1 | 0 | 1 | 2  |
| <b>Galliformes</b>         | Turkey                 | <i>Meleagris gallopavo</i>        | Omnivore  | 2 | 0 | 2 | 4  |
|                            | Chicken                | <i>Gallus gallus</i>              | Granivore | 3 | 0 | 0 | 3  |
| <b>Anseriformes</b>        | Peking Duck            | <i>Anas platyrhynchos</i>         | Granivore | 2 | 2 | 0 | 4  |
| <b>Tinamiformes</b>        | White-throated Tinamou | <i>Tinamus guttatus</i>           | Granivore | 2 | 0 | 0 | 2  |
| <b>Struthioniformes</b>    | Common Ostrich         | <i>Struthio camelus</i>           | Granivore | 1 | 0 | 1 | 2  |
| <b>Crocodylia</b>          | Alligator              | <i>Alligator mississippiensis</i> | Carnivore | 7 | 0 | 3 | 10 |
|                            | Crocodile              | <i>Crocodylus porosus</i>         | Carnivore | 5 | 0 | 1 | 6  |
|                            | Gharial                | <i>Gavialis gangeticus</i>        | Carnivore | 8 | 0 | 3 | 11 |

<sup>†</sup>Note - The diet classification for each bird was determined by a food type predominated in its diet with 51% or more.



**Table S5. Genomic locations for all avian *Tas2r* genes studied. Potential tandem duplicated genes were highlighted in gray.**

| Species                 | Gene name                         | Gene type  | Genomic location |               |             |             |
|-------------------------|-----------------------------------|------------|------------------|---------------|-------------|-------------|
|                         |                                   |            | Scaffold         | Subject start | Subject end | Orientation |
| Rifleman                | Rifleman_Tas2r2                   | Intact     | scaffold4455     | 7457          | 6453        | -           |
|                         | Rifleman_Tas2r1                   | Intact     | scaffold4455     | 2206          | 1253        | -           |
|                         | Rifleman_Tas2r3                   | Intact     | scaffold8056     | 12904         | 11933       | -           |
|                         | Rifleman_Tas2r5_P                 | Partial    | scaffold12242    | 3985          | 4458        | +           |
|                         | Rifleman_Tas2r4                   | Intact     | scaffold12242    | 7500          | 8450        | +           |
|                         | Rifleman_Tas2r6_P                 | Partial    | scaffold28229    | 1             | 684         | +           |
|                         | Rifleman_Tas2r7_P                 | Partial    | C16332196        | 463           | 681         | +           |
|                         | Rifleman_Tas2r8_P                 | Partial    | scaffold28228    | 1             | 681         | +           |
|                         | Rifleman_Tas2r9_Ps                | Pseudogene | scaffold31809    | 1100          | 1402        | +           |
| Golden-collared Manakin | Golden-collared_Manakin_Tas2r1    | Intact     | scaffold208      | 227981        | 227016      | -           |
|                         | Golden-collared_Manakin_Tas2r3    | Intact     | scaffold300      | 1025772       | 1024837     | -           |
|                         | Golden-collared_Manakin_Tas2r2    | Intact     | scaffold114      | 1187          | 2152        | +           |
|                         | Golden-collared_Manakin_Tas2r9_Ps | Pseudogene | scaffold114      | 6615          | 6999        | +           |
|                         | Golden-collared_Manakin_Tas2r6    | Intact     | scaffold114      | 9190          | 10137       | +           |
|                         | Golden-collared_Manakin_Tas2r4    | Intact     | scaffold114      | 14217         | 15158       | +           |
|                         | Golden-collared_Manakin_Tas2r5    | Intact     | scaffold114      | 17745         | 18698       | +           |
|                         | Golden-collared_Manakin_Tas2r7_P  | Partial    | scaffold920      | 8287          | 8942        | +           |
|                         | Golden-collared_Manakin_Tas2r8_P  | Partial    | scaffold2273     | 588           | 76          | -           |
| Medium Ground Finch     | Medium_Ground_Finch_Tas2r1        | Intact     | scaffold52       | 273539        | 272586      | -           |
|                         | Medium_Ground_Finch_Tas2r3        | Intact     | scaffold52       | 268377        | 267424      | -           |
|                         | Medium_Ground_Finch_Tas2r4        | Intact     | scaffold52       | 265312        | 264353      | -           |
|                         | Medium_Ground_Finch_Tas2r2        | Intact     | scaffold884      | 340322        | 339363      | -           |
|                         | Medium_Ground_Finch_Tas2r9_P      | Partial    | scaffold1047     | 222842        | 222346      | -           |
|                         | Medium_Ground_Finch_Tas2r5        | Intact     | scaffold1047     | 226160        | 227095      | +           |
|                         | Medium_Ground_Finch_Tas2r6        | Intact     | scaffold1047     | 229180        | 230115      | +           |
|                         | Medium_Ground_Finch_Tas2r7_P      | Partial    | scaffold4119     | 1             | 474         | +           |

|                    |                                |            |                 |               |               |   |
|--------------------|--------------------------------|------------|-----------------|---------------|---------------|---|
|                    | Medium_Ground_Finch_Tas2r8_P   | Partial    | scaffold748     | 1173          | 218           | - |
|                    | Medium_Ground_Finch_Tas2r10_Ps | Pseudogene | scaffold16      | 15333977      | 15334638      | + |
|                    | Medium_Ground_Finch_Tas2r11_Ps | Pseudogene | scaffold98      | 2326511       | 2326828       | + |
| American Crow      | American_Crow_Tas2r5           | Intact     | scaffold116     | 14005127      | 14005987      | + |
|                    | American_Crow_Tas2r4           | Intact     | scaffold116     | 14009670      | 14010503      | + |
|                    | American_Crow_Tas2r6           | Intact     | scaffold116     | 14014569      | 14015522      | + |
|                    | American_Crow_Tas2r3           | Intact     | scaffold116     | 14020521      | 14021474      | + |
|                    | American_Crow_Tas2r7           | Intact     | scaffold116     | 14023651      | 14024523      | + |
|                    | American_Crow_Tas2r1           | Intact     | scaffold44      | 3712104       | 3711139       | - |
|                    | American_Crow_Tas2r9_Ps        | Pseudogene | scaffold176     | 231755        | 232486        | + |
|                    | American_Crow_Tas2r8_P         | Partial    | scaffold176     | 235228/246101 | 236057/246932 | + |
|                    | American_Crow_Tas2r2           | Intact     | scaffold176     | 259591        | 260457        | + |
|                    | American_Crow_Tas2r10_Ps       | Pseudogene | scaffold176     | 261052        | 261675        | + |
| Zebra Finch        | Zebra_Finch_Tas2r7             | Intact     | 197886634       | 34532         | 33597         | - |
|                    | Zebra_Finch_Tas2r1             | Intact     | 197886634       | 31495         | 30563         | - |
|                    | Zebra_Finch_Tas2r3             | Intact     | 197886632       | 4989          | 4054          | - |
|                    | Zebra_Finch_Tas2r5             | Intact     | 197889227       | 1229          | 2182          | + |
|                    | Zebra_Finch_Tas2r4             | Intact     | 197889227       | 5553          | 6506          | + |
|                    | Zebra_Finch_Tas2r2             | Intact     | 197889227       | 8615          | 9556          | + |
|                    | Zebra_Finch_Tas2r6             | Intact     | 197889228       | 25001         | 25951         | + |
|                    | Zebra_Finch_Tas2r8_Ps          | Pseudogene | 197886466       | 66259         | 65558         | - |
| Budgerigar         | Budgerigar_Tas2r1              | Intact     | scf900160277026 | 5924866       | 5923916       | - |
|                    | Budgerigar_Tas2r2_Ps           | Pseudogene | scf900160277078 | 2394556       | 2394238       | - |
| Kea                | Kea_Tas2r1                     | Intact     | scaffold708     | 17773         | 16823         | - |
|                    | Kea_Tas2r2_Ps                  | Pseudogene | scaffold2803    | 24786         | 25289         | + |
| Peregrine Falcon   | Falco_peregrinus_Tas2r1        | Intact     | scaffold36_1    | 974909        | 973959        | - |
|                    | Falco_peregrinus_Tas2r2        | Intact     | scaffold236_2   | 252192        | 251236        | - |
| Red-legged Seriema | Red-legged_Seriema_Tas2r1      | Intact     | scaffold4031    | 30673         | 31608         | + |
|                    | Red-legged_Seriema_Tas2r2      | Intact     | scaffold19391   | 18028         | 17084         | - |
| Carmine Bee-eater  | Carmine_Bee-eater_Tas2r1       | Intact     | scaffold3372    | 87990         | 88961         | + |

|                     |                               |            |               |         |         |   |
|---------------------|-------------------------------|------------|---------------|---------|---------|---|
|                     | Carmine_Bee-eater_Tas2r2_P    | Partial    | scaffold19532 | 33317   | 33655   | + |
|                     | Carmine_Bee-eater_Tas2r3_P    | Partial    | scaffold20440 | 408     | 1       | - |
|                     | Carmine_Bee-eater_Tas2r4_P    | Partial    | scaffold41834 | 665     | 153     | - |
| Downy Woodpecker    | Downy_Woodpecker_Tas2r3       | Intact     | scaffold415   | 197347  | 198282  | + |
|                     | Downy_Woodpecker_Tas2r1       | Intact     | scaffold167   | 1583542 | 1582640 | - |
|                     | Downy_Woodpecker_Tas2r5_Ps    | Pseudogene | scaffold167   | 1203820 | 1202920 | - |
|                     | Downy_Woodpecker_Tas2r2       | Intact     | scaffold167   | 1199105 | 1198152 | - |
|                     | Downy_Woodpecker_Tas2r4       | Intact     | scaffold167   | 1194675 | 1193722 | - |
| Rhinoceros Hornbill | Rhinoceros_Hornbill_Tas2r1    | Intact     | scaffold12344 | 27568   | 26621   | - |
|                     | Rhinoceros_Hornbill_Tas2r2_P  | Partial    | scaffold13313 | 15130   | 14588   | - |
|                     | Rhinoceros_Hornbill_Tas2r3_Ps | Pseudogene | scaffold16794 | 48703   | 49158   | + |
| Bar-tailed Trogon   | Bar-tailed_Trogon_Tas2r1      | Intact     | C12131352     | 2119    | 1166    | - |
|                     | Bar-tailed_Trogon_Tas2r2      | Intact     | scaffold21851 | 7714    | 6761    | - |
|                     | Bar-tailed_Trogon_Tas2r3      | Intact     | scaffold31381 | 3617    | 2655    | - |
|                     | Bar-tailed_Trogon_Tas2r4      | Intact     | scaffold1004  | 9023    | 8070    | - |
|                     | Bar-tailed_Trogon_Tas2r5      | Intact     | scaffold11293 | 1524    | 586     | - |
|                     | Bar-tailed_Trogon_Tas2r6_P    | Partial    | scaffold6731  | 959     | 179     | - |
|                     | Bar-tailed_Trogon_Tas2r7_P    | Partial    | scaffold2738  | 3688    | 3284    | - |
|                     | Bar-tailed_Trogon_Tas2r8_P    | Partial    | scaffold23126 | 870     | 280     | - |
|                     | Bar-tailed_Trogon_Tas2r9_P    | Partial    | scaffold15085 | 4       | 248     | + |
|                     | Bar-tailed_Trogon_Tas2r10_P   | Partial    | scaffold22121 | 895     | 1149    | + |
|                     | Bar-tailed_Trogon_Tas2r11_P   | Partial    | scaffold41964 | 431     | 3       | - |
|                     | Bar-tailed_Trogon_Tas2r12_Ps  | Pseudogene | scaffold21145 | 631     | 212     | - |
|                     | Bar-tailed_Trogon_Tas2r13_Ps  | Pseudogene | scaffold5893  | 3341    | 3673    | + |
| Cuckoo Roller       | Cuckoo_Roller_Tas2r1          | Intact     | scaffold14764 | 1156    | 2103    | + |
|                     | Cuckoo_Roller_Tas2r2          | Intact     | scaffold9319  | 79935   | 80882   | + |
| Speckled Mousebird  | Speckled_Mousebird_Tas2r1     | Intact     | scaffold12255 | 22430   | 21483   | - |
|                     | Speckled_Mousebird_Tas2r2_P   | Partial    | scaffold37637 | 864     | 1       | - |
|                     | Speckled_Mousebird_Tas2r3_P   | Partial    | scaffold38140 | 110     | 627     | + |
|                     | Speckled_Mousebird_Tas2r4_P   | Partial    | scaffold37670 | 327     | 1       | - |

|                    |                              |            |               |         |         |   |
|--------------------|------------------------------|------------|---------------|---------|---------|---|
| Barn Owl           | Barn_Owl_Tas2r1              | Intact     | scaffold2332  | 27837   | 26890   | - |
|                    | Barn_Owl_Tas2r2              | Intact     | scaffold45413 | 3568    | 2615    | - |
| White-tailed Eagle | White-tailed_Eagle_Tas2r1    | Intact     | scaffold37208 | 12737   | 13684   | + |
|                    | White-tailed_Eagle_Tas2r2    | Intact     | scaffold28067 | 1469    | 2404    | + |
|                    | White-tailed_Eagle_Tas2r3_Ps | Pseudogene | scaffold6740  | 109178  | 109689  | + |
| Bald Eagle         | Bald_Eagle_Tas2r1            | Intact     | Scaffold417   | 20795   | 21742   | + |
|                    | Bald_Eagle_Tas2r2            | Intact     | Scaffold1158  | 116576  | 117511  | + |
|                    | Bald_Eagle_Tas2r3_Ps         | Pseudogene | Scaffold2485  | 264533  | 264132  | - |
| Turkey Vulture     | Turkey_Vulture_Tas2r1        | Intact     | scaffold669   | 17751   | 16822   | - |
|                    | Turkey_Vulture_Tas2r2        | Intact     | scaffold12515 | 10755   | 9820    | - |
|                    | Turkey_Vulture_Tas2r3_Ps     | Pseudogene | scaffold8688  | 22181   | 21309   | - |
| Dalmatian Pelican  | Dalmatian_Pelican_Tas2r1     | Intact     | scaffold5020  | 54960   | 55913   | + |
|                    | Dalmatian_Pelican_Tas2r2_Ps  | Pseudogene | scaffold1017  | 134426  | 133610  | - |
| Little Egret       | Little_Egret_Tas2r2          | Intact     | scaffold323   | 734669  | 735129  | + |
|                    | Little_Egret_Tas2r1          | Intact     | scaffold235   | 857838  | 858791  | + |
|                    | Little_Egret_Tas2r3_Ps       | Pseudogene | scaffold85    | 4378460 | 4377559 | - |
| Crested Ibis       | Crested_Ibis_Tas2r1          | Intact     | Scaffold6     | 7962604 | 7963572 | + |
|                    | Crested_Ibis_Tas2r2          | Intact     | Scaffold155   | 4229721 | 4230674 | + |
| Great Cormorant    | Great_Cormorant_Tas2r1       | Intact     | scaffold16155 | 44227   | 45180   | + |
|                    | Great_Cormorant_Tas2r2_Ps    | Pseudogene | scaffold1307  | 8247    | 7459    | - |
| Northern Fulmar    | Northern_Fulmar_Tas2r1       | Intact     | scaffold3220  | 32172   | 33119   | + |
|                    | Northern_Fulmar_Tas2r2       | Intact     | scaffold2043  | 1921    | 968     | - |
| Emperor Penguin    | Emperor_Penguin_Tas2r1_Ps    | Pseudogene | Scaffold405   | 350048  | 350730  | + |
|                    | Emperor_Penguin_Tas2r2_Ps    | Pseudogene | Scaffold231   | 4670477 | 4669656 | - |
|                    | Emperor_Penguin_Tas2r3_Ps    | Pseudogene | Scaffold57    | 3998393 | 3997770 | - |
| Adelie Penguin     | Adelie_Penguin_Tas2r1_Ps     | Pseudogene | Scaffold84    | 2982957 | 2983310 | + |
|                    | Adelie_Penguin_Tas2r2_Ps     | Pseudogene | Scaffold120   | 373785  | 374467  | + |
|                    | Adelie_Penguin_Tas2r3_Ps     | Pseudogene | Scaffold121   | 4214242 | 4215192 | + |
| Red-throated Loon  | Red-throated_Loon_Tas2r1_Ps  | Pseudogene | scaffold5827  | 40213   | 40977   | + |
|                    | Red-throated_Loon_Tas2r2_Ps  | Pseudogene | scaffold9999  | 6330    | 7052    | + |

|                         |                                   |            |               |         |         |   |
|-------------------------|-----------------------------------|------------|---------------|---------|---------|---|
| White-tailed Tropicbird | Red-throated_Loon_Tas2r3_Ps       | Pseudogene | scaffold6843  | 3746    | 4108    | + |
|                         | White-tailed_Tropicbird_Tas2r1    | Intact     | scaffold4143  | 36540   | 37490   | + |
| Sunbittern              | White-tailed_Tropicbird_Tas2r2_Ps | Pseudogene | scaffold8246  | 28218   | 28808   | + |
|                         | Sunbittern_Tas2r1                 | Intact     | scaffold37432 | 10666   | 11613   | + |
| Killdeer                | Sunbittern_Tas2r2                 | Intact     | C15859869     | 1291    | 338     | - |
|                         | Killdeer_Tas2r1                   | Intact     | scaffold1     | 8183821 | 8184768 | + |
| Grey Crowned Crane      | Killdeer_Tas2r2                   | Intact     | scaffold301   | 300207  | 301139  | + |
|                         | Killdeer_Tas2r3                   | Intact     | scaffold800   | 300112  | 301065  | + |
|                         | Grey_Crowned_Crane_Tas2r1         | Intact     | scaffold1927  | 37295   | 38248   | + |
| Hoatzin                 | Grey_Crowned_Crane_Tas2r2         | Intact     | scaffold12917 | 15309   | 14374   | - |
|                         | Grey_Crowned_Crane_Tas2r3_Ps      | Pseudogene | scaffold8931  | 32614   | 32237   | - |
|                         | Hoatzin_Tas2r1                    | Intact     | scaffold1028  | 1673    | 720     | - |
|                         | Hoatzin_Tas2r2                    | Intact     | scaffold659   | 3004    | 3957    | + |
|                         | Hoatzin_Tas2r3                    | Intact     | scaffold813   | 102136  | 103071  | + |
|                         | Hoatzin_Tas2r4                    | Intact     | scaffold256   | 1620801 | 1621754 | + |
| Anna's Hummingbird      | Hummingbird_Tas2r3                | Intact     | scaffold127   | 2659677 | 2658724 | - |
|                         | Hummingbird_Tas2r6                | Intact     | scaffold127   | 2655667 | 2654714 | - |
|                         | Hummingbird_Tas2r4                | Intact     | scaffold33    | 3789761 | 3788835 | - |
|                         | Hummingbird_Tas2r2                | Intact     | scaffold372   | 10650   | 9697    | - |
|                         | Hummingbird_Tas2r12_Ps            | Pseudogene | scaffold372   | 7772    | 7377    | - |
|                         | Hummingbird_Tas2r5                | Intact     | scaffold372   | 5703    | 4750    | - |
|                         | Hummingbird_Tas2r1                | Intact     | scaffold372   | 1304    | 342     | - |
|                         | Hummingbird_Tas2r7_P              | Partial    | C10465731     | 3       | 224     | + |
|                         | Hummingbird_Tas2r8_P              | Partial    | C10690480     | 3       | 242     | + |
|                         | Hummingbird_Tas2r9_P              | Partial    | C10499692     | 242     | 3       | - |
|                         | Hummingbird_Tas2r10_P             | Partial    | C10429533     | 3       | 203     | + |
| Chimney Swift           | Hummingbird_Tas2r11_Ps            | Pseudogene | C10902572     | 676     | 162     | - |
|                         | Chimney_Swift_Tas2r1              | Intact     | scaffold46    | 6393863 | 6394828 | + |
|                         | Chimney_Swift_Tas2r4              | Intact     | scaffold277   | 283732  | 282785  | - |
|                         | Chimney_Swift_Tas2r2              | Intact     | scaffold99    | 2644851 | 2643886 | - |

|                            |                                      |            |               |           |           |   |
|----------------------------|--------------------------------------|------------|---------------|-----------|-----------|---|
|                            | Chimney_Swift_Tas2r3                 | Intact     | scaffold99    | 2641505   | 2640543   | - |
|                            | Chimney_Swift_Tas2r6_P               | Partial    | scaffold99    | 2636740   | 2636288   | - |
| Chuck-will's-widow         | Chimney_Swift_Tas2r5_P               | Partial    | scaffold46    | 6389989   | 6390327   | + |
|                            | Chuck-wills-widow_Tas2r1             | Intact     | scaffold396   | 2121      | 3047      | + |
|                            | Chuck-wills-widow_Tas2r2             | Intact     | scaffold1914  | 4972      | 4025      | - |
|                            | Chuck-wills-widow_Tas2r3             | Intact     | scaffold1000  | 93270     | 92323     | - |
| MacQueen's Bustard         | MacQueens_Bustard_Tas2r1             | Intact     | scaffold23313 | 3506      | 2580      | - |
|                            | MacQueens_Bustard_Tas2r2             | Intact     | scaffold414   | 82836     | 81925     | - |
|                            | MacQueens_Bustard_Tas2r3_P           | Partial    | C15284394     | 1         | 474       | + |
|                            | MacQueens_Bustard_Tas2r4_P           | Partial    | C15304738     | 265       | 525       | + |
| Red-crested Turaco         | Red-crested_Turaco_Tas2r1            | Intact     | scaffold2314  | 23361     | 22441     | - |
|                            | Red-crested_Turaco_Tas2r2            | Intact     | scaffold34572 | 20881     | 19928     | - |
|                            | Red-crested_Turaco_Tas2r3            | Intact     | scaffold18533 | 42888     | 41941     | - |
| Common Cuckoo              | Common_Cuckoo_Tas2r1                 | Intact     | scaffold15    | 9317171   | 9316224   | - |
|                            | Common_Cuckoo_Tas2r2                 | Intact     | scaffold463   | 861923    | 860972    | - |
|                            | Common_Cuckoo_Tas2r3_P               | Partial    | scaffold463   | 832513    | 832188    | - |
| Brown Mesite               | Brown_Mesite_Tas2r1                  | Intact     | scaffold7920  | 19231     | 18269     | - |
|                            | Brown_Mesite_Tas2r2                  | Intact     | scaffold2045  | 26762     | 27703     | + |
|                            | Brown_Mesite_Tas2r3                  | Intact     | scaffold16819 | 19640     | 20575     | + |
| Yellow-throated Sandgrouse | Yellow-throated_Sandgrouse_Tas2r1    | Intact     | scaffold1013  | 45299     | 46249     | + |
|                            | Yellow-throated_Sandgrouse_Tas2r2_Ps | Pseudogene | scaffold28979 | 19334     | 19654     | + |
|                            | Yellow-throated_Sandgrouse_Tas2r3_Ps | Pseudogene | scaffold15952 | 19934     | 19538     | - |
| Domestic Pigeon            | Domestic_Pigeon_Tas2r1               | Intact     | scaffold589   | 321699    | 322652    | + |
| American Flamingo          | American_Flamingo_Tas2r1             | Intact     | scaffold3389  | 6195      | 7154      | + |
|                            | American_Flamingo_Tas2r2             | Intact     | scaffold9414  | 12146     | 11193     | - |
| Great Crested Grebe        | Great_Crested_Grebe_Tas2r1           | Intact     | scaffold16170 | 8914      | 7964      | - |
|                            | Great_Crested_Grebe_Tas2r2_Ps        | Pseudogene | scaffold2598  | 19885     | 20763     | + |
| Turkey                     | Turkey_Tas2r1                        | Intact     | chromosome2   | 115831982 | 115830963 | - |
|                            | Turkey_Tas2r2                        | Intact     | chromosome1   | 199170357 | 199171292 | + |
|                            | Turkey_Tas2r3_Ps                     | Pseudogene | chromosome1   | 81484150  | 81483545  | - |

|                        |                               |            |              |          |          |   |
|------------------------|-------------------------------|------------|--------------|----------|----------|---|
| Chicken                | Turkey_Tas2r4_Ps              | Pseudogene | chromosome1  | 81511020 | 81510565 | - |
|                        | Chicken_Tas2r1                | Intact     | 354539478    | 114300   | 115265   | + |
|                        | Chicken_Tas2r2                | Intact     | 354542216    | 41217    | 40282    | - |
| Peking Duck            | Chicken_Tas2r3                | Intact     | 354541529    | 5258     | 6193     | + |
|                        | Peking_Duck_Tas2r1            | Intact     | scaffold1150 | 546595   | 547530   | + |
|                        | Peking_Duck_Tas2r2            | Intact     | scaffold470  | 320497   | 319553   | - |
|                        | Peking_Duck_Tas2r3_P          | Partial    | C18799681    | 326      | 3        | - |
| White-throated Tinamou | Peking_Duck_Tas2r4_P          | Partial    | scaffold2869 | 1        | 729      | + |
|                        | White-throated_Tinamou_Tas2r1 | Intact     | scaffold1945 | 19999    | 19064    | - |
|                        | White-throated_Tinamou_Tas2r2 | Intact     | scaffold252  | 624516   | 625445   | + |
| Common Ostrich         | Common_Ostrich_Tas2r1         | Intact     | scaffold494  | 1849648  | 1848713  | - |
|                        | Common_Ostrich_Tas2r2_Ps      | Pseudogene | scaffold966  | 256186   | 256888   | + |

---

**Table S6. Tandem duplicated *Tas2r* genes and the lengths of their scaffolds.**

| <b>Species</b>                 | <b>Scaffold</b> | <b>Scaffold length (bp)</b> | <b><i>Tas2r</i> gene number</b> |
|--------------------------------|-----------------|-----------------------------|---------------------------------|
| <b>Rifleman</b>                | scaffold4455    | 79059                       | 2                               |
|                                | scaffold12242   | 12473                       | 2                               |
| <b>Golden-collared Manakin</b> | scaffold114     | 2564601                     | 5                               |
| <b>Medium Ground Finch</b>     | scaffold52      | 279058                      | 3                               |
|                                | scaffold1047    | 566768                      | 3                               |
| <b>American Crow</b>           | scaffold116     | 16488145                    | 5                               |
|                                | scaffold176     | 604260                      | 4                               |
| <b>Downy Woodpecker</b>        | scaffold167     | 3849947                     | 4                               |
| <b>Anna's Hummingbird</b>      | scaffold127     | 2661235                     | 2                               |
|                                | scaffold372     | 3831364                     | 4                               |
| <b>Chimney Swift</b>           | scaffold99      | 2651650                     | 3                               |
| <b>Zebra Finch</b>             | 197886634       | 36224                       | 2                               |
|                                | 197889227       | 112379                      | 3                               |

**Table S7. Potential gene conversion events between avian *Tas2r* genes.**

| <b>Sequence pair</b>                                      | <b><i>P</i> value</b> | <b>Fragment length</b> |
|-----------------------------------------------------------|-----------------------|------------------------|
| Zebra_Finch_ <i>Tas2r1</i> and Zebra_Finch_ <i>Tas2r3</i> | 0.01047               | 71 aa                  |
| Zebra_Finch_ <i>Tas2r3</i> and Zebra_Finch_ <i>Tas2r7</i> | 0.02702               | 75 aa                  |



## Figure Legends

**Figure S1.** The Bayesian Inference (BI) phylogenetic tree with detailed species and gene names, and Bayesian posterior probabilities as percentages that were not shown in figure 1.

**Figure S2.** The Bayesian phylogenetic tree topology, where nodes with Bayesian posterior probabilities below 50% were collapsed. See details in figure S1.

**Figure S3.** The neighbor-joining phylogenetic tree with pairwise-deletion of gaps.

**Figure S4.** The neighbor-joining phylogenetic tree with complete-deletion of gaps.

**Figure S5.** While coded the red-legged seriema as 1, the repeated phylogenetically independent contrast (PIC) analysis confirmed the correlation between diet codes and putatively functional *Tas2r* gene numbers (A), and revealed a same trend between PICs of diet codes and those of total *Tas2r* gene numbers (B).

**Figure S6.** No correlation between the contig N50 length of each genome and the fraction of partial *Tas2r* genes.

Figure S1

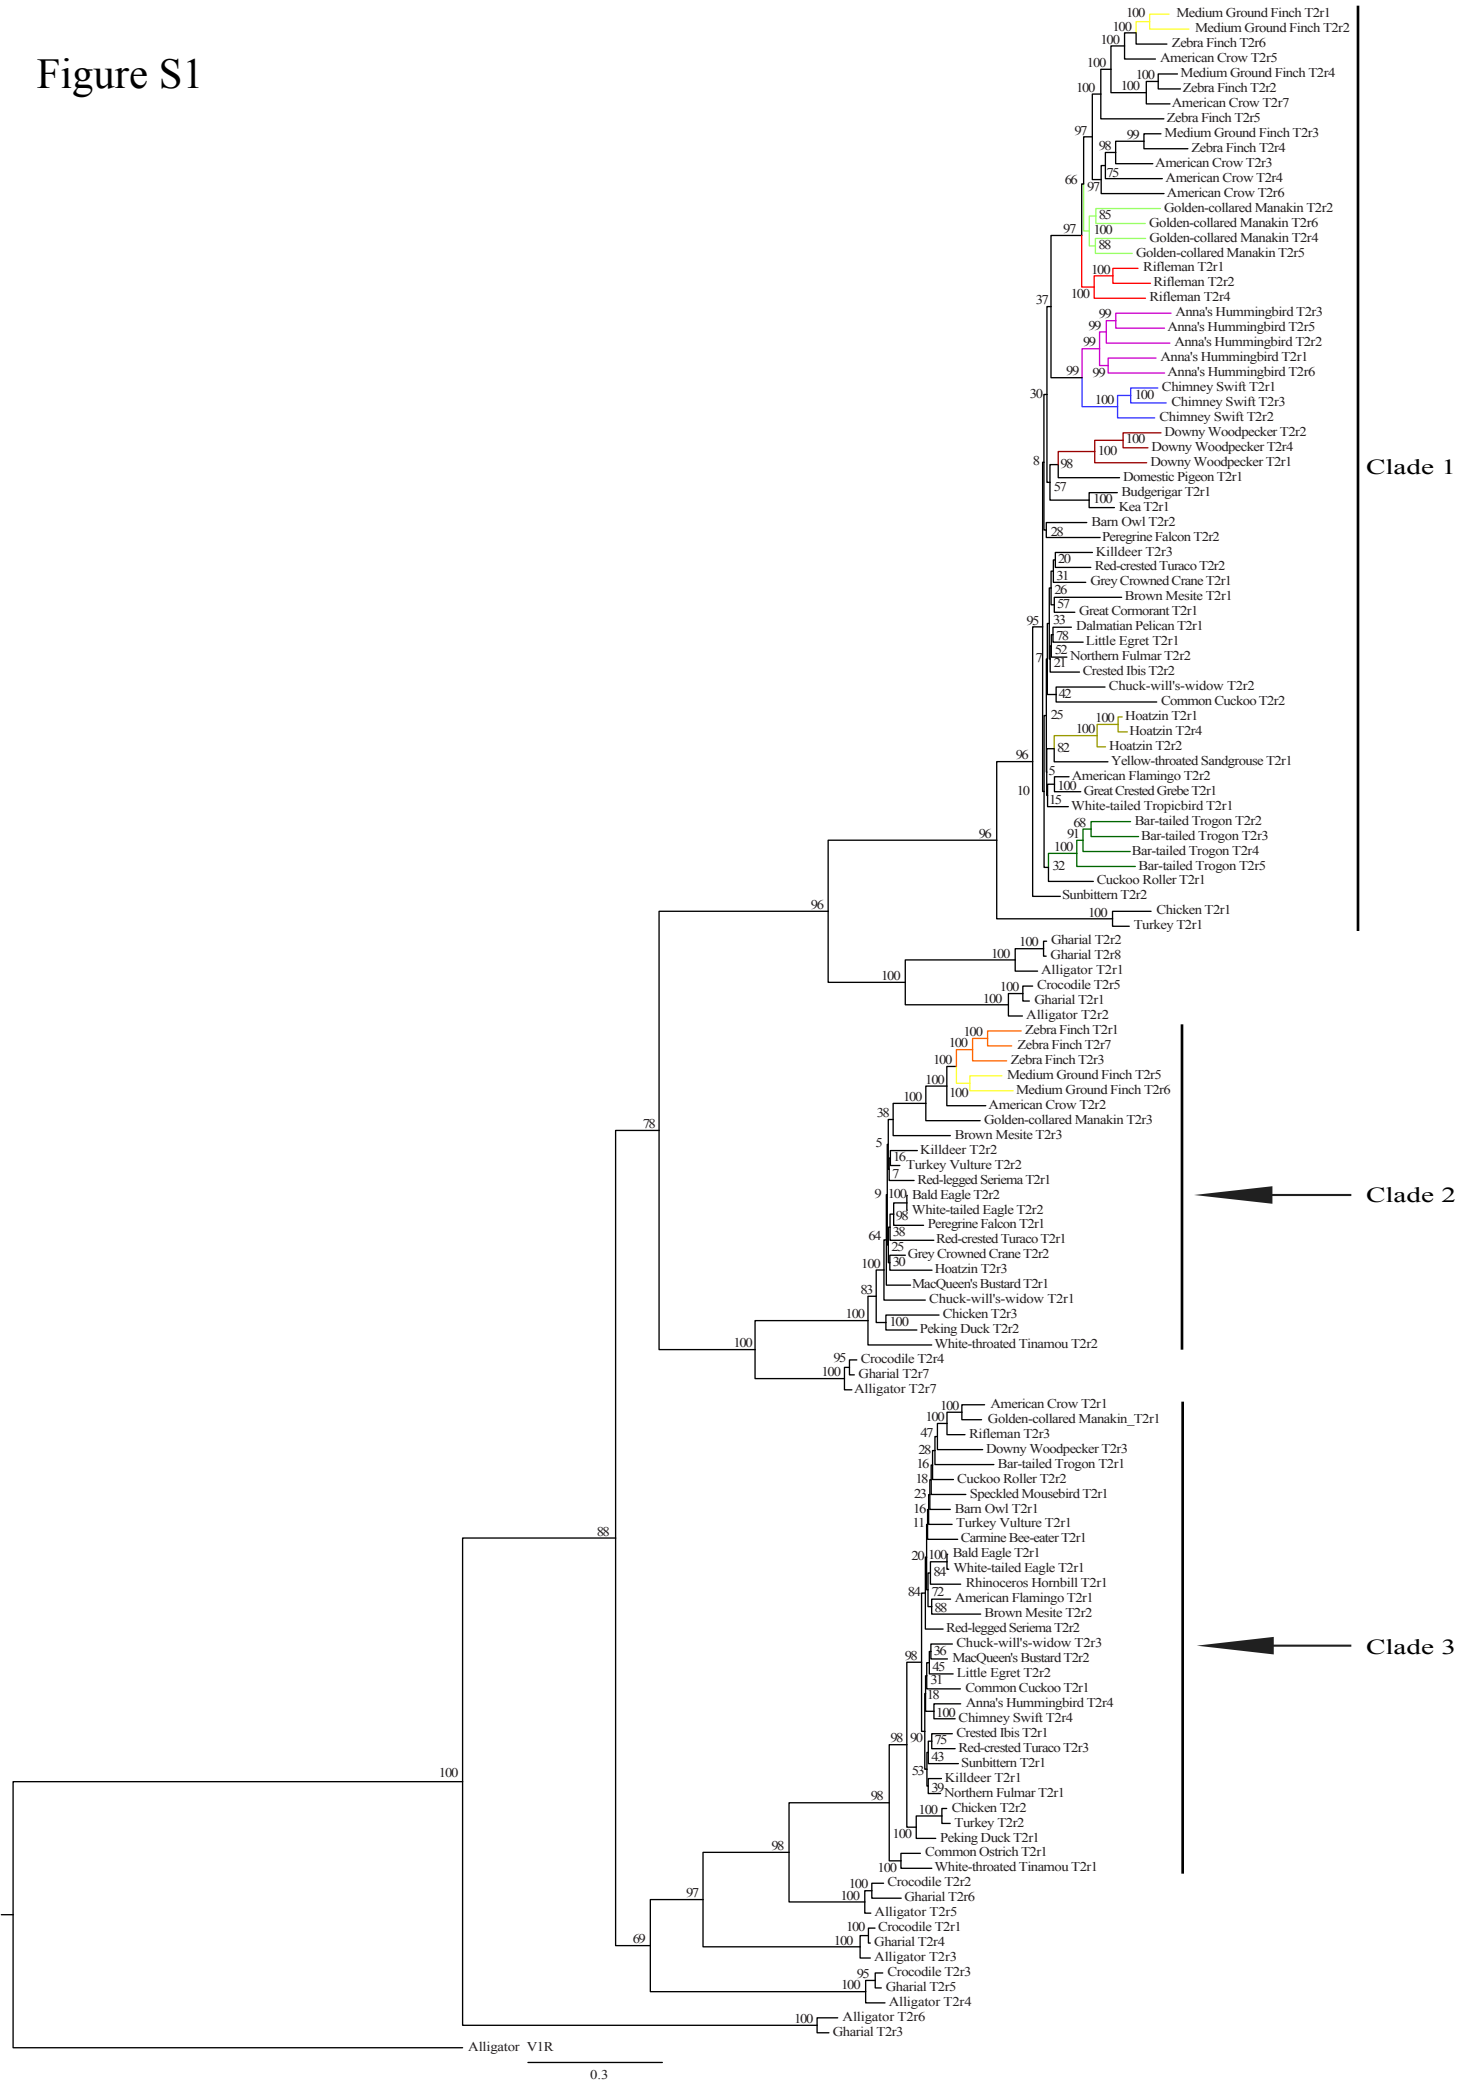

Figure S2

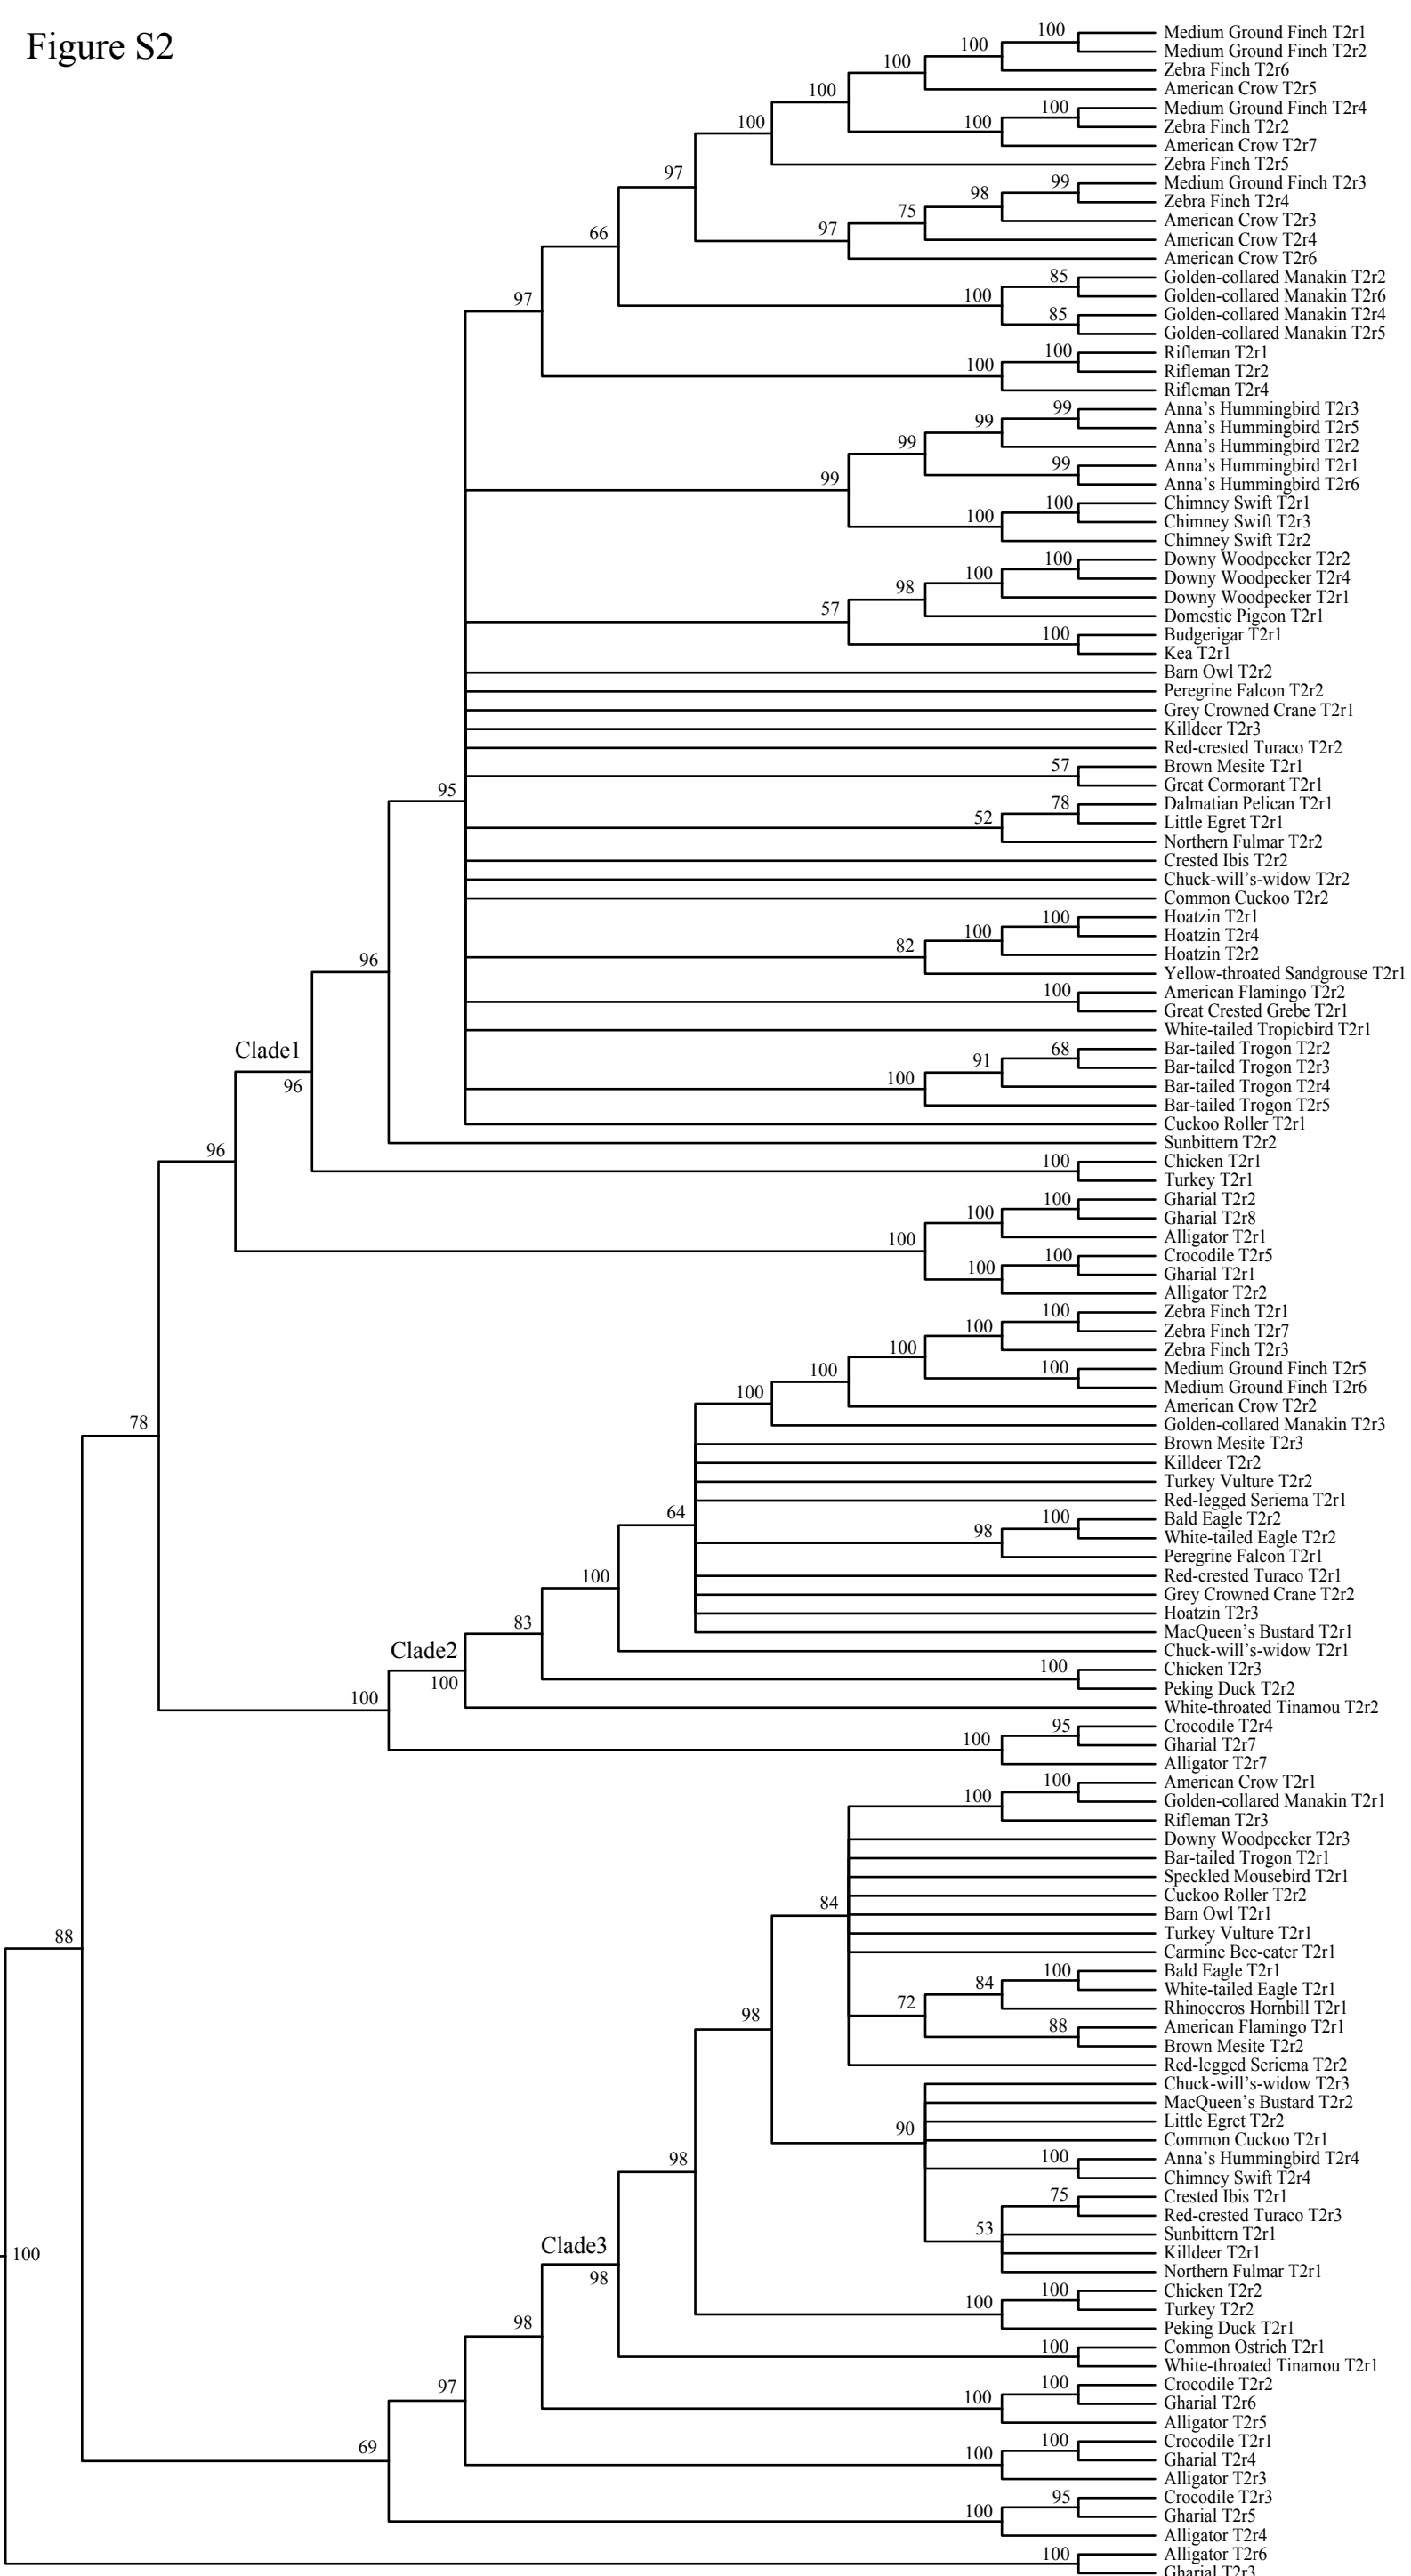

Figure S3

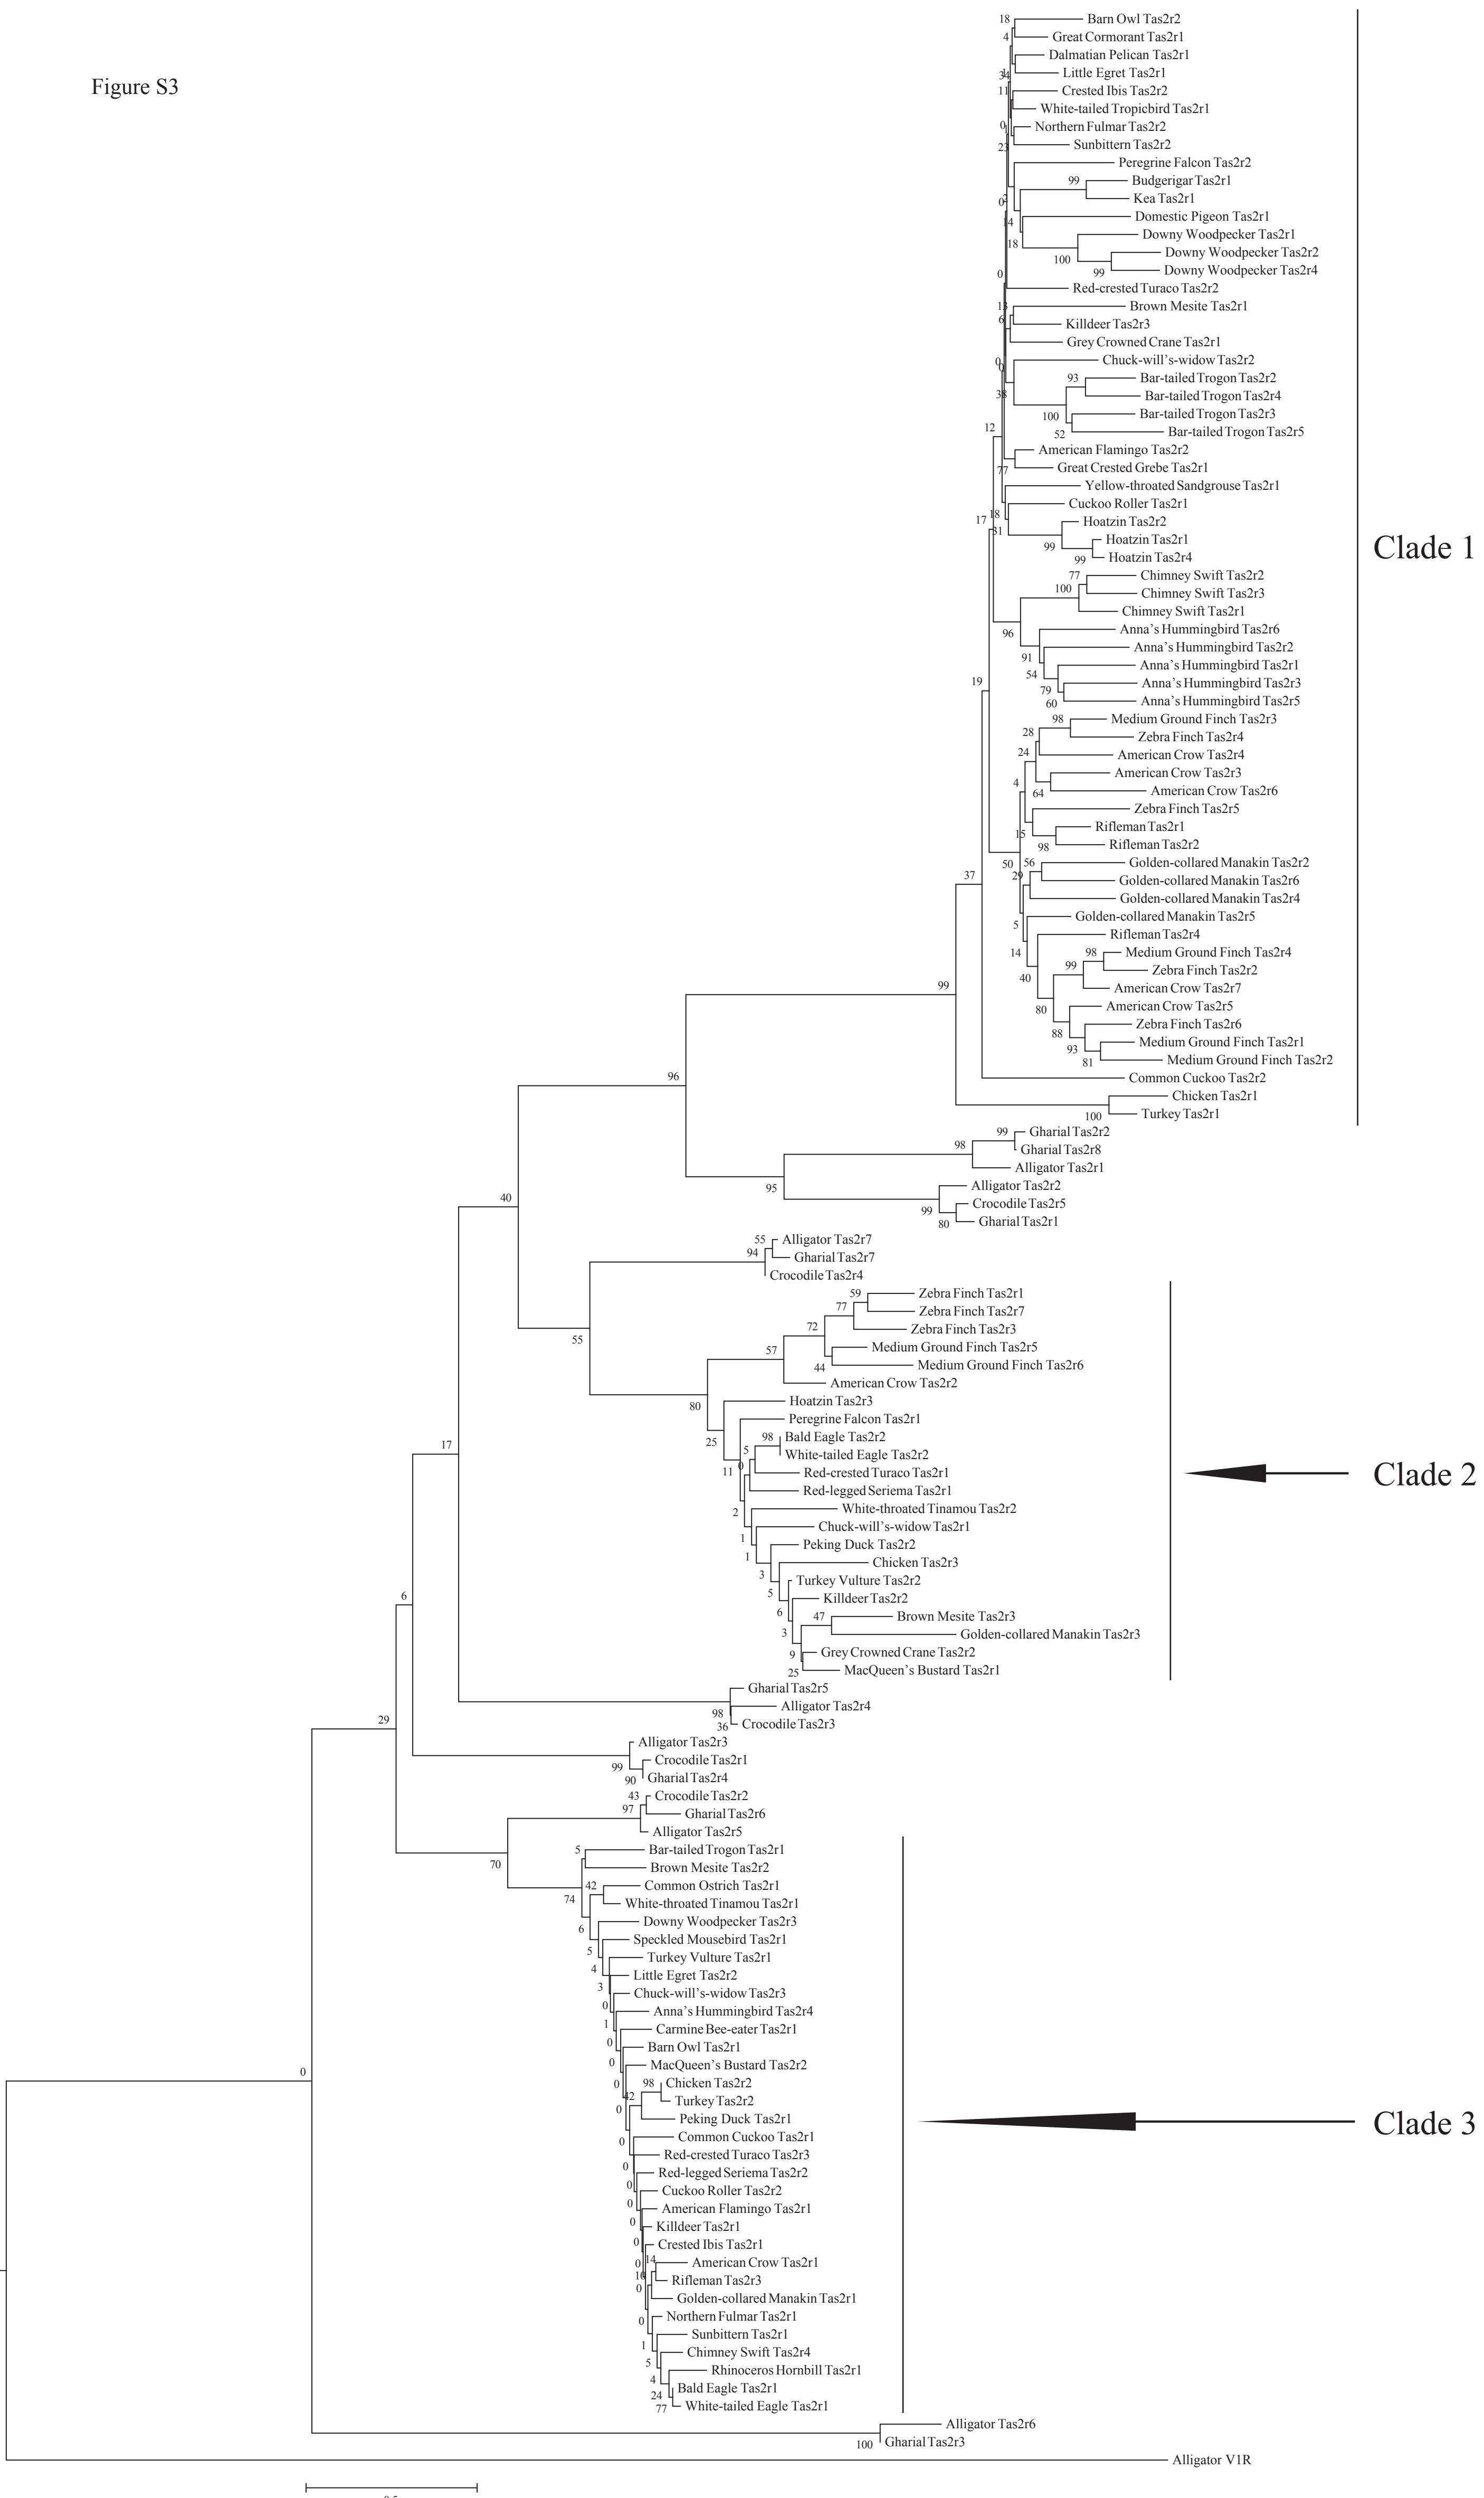

Figure S4

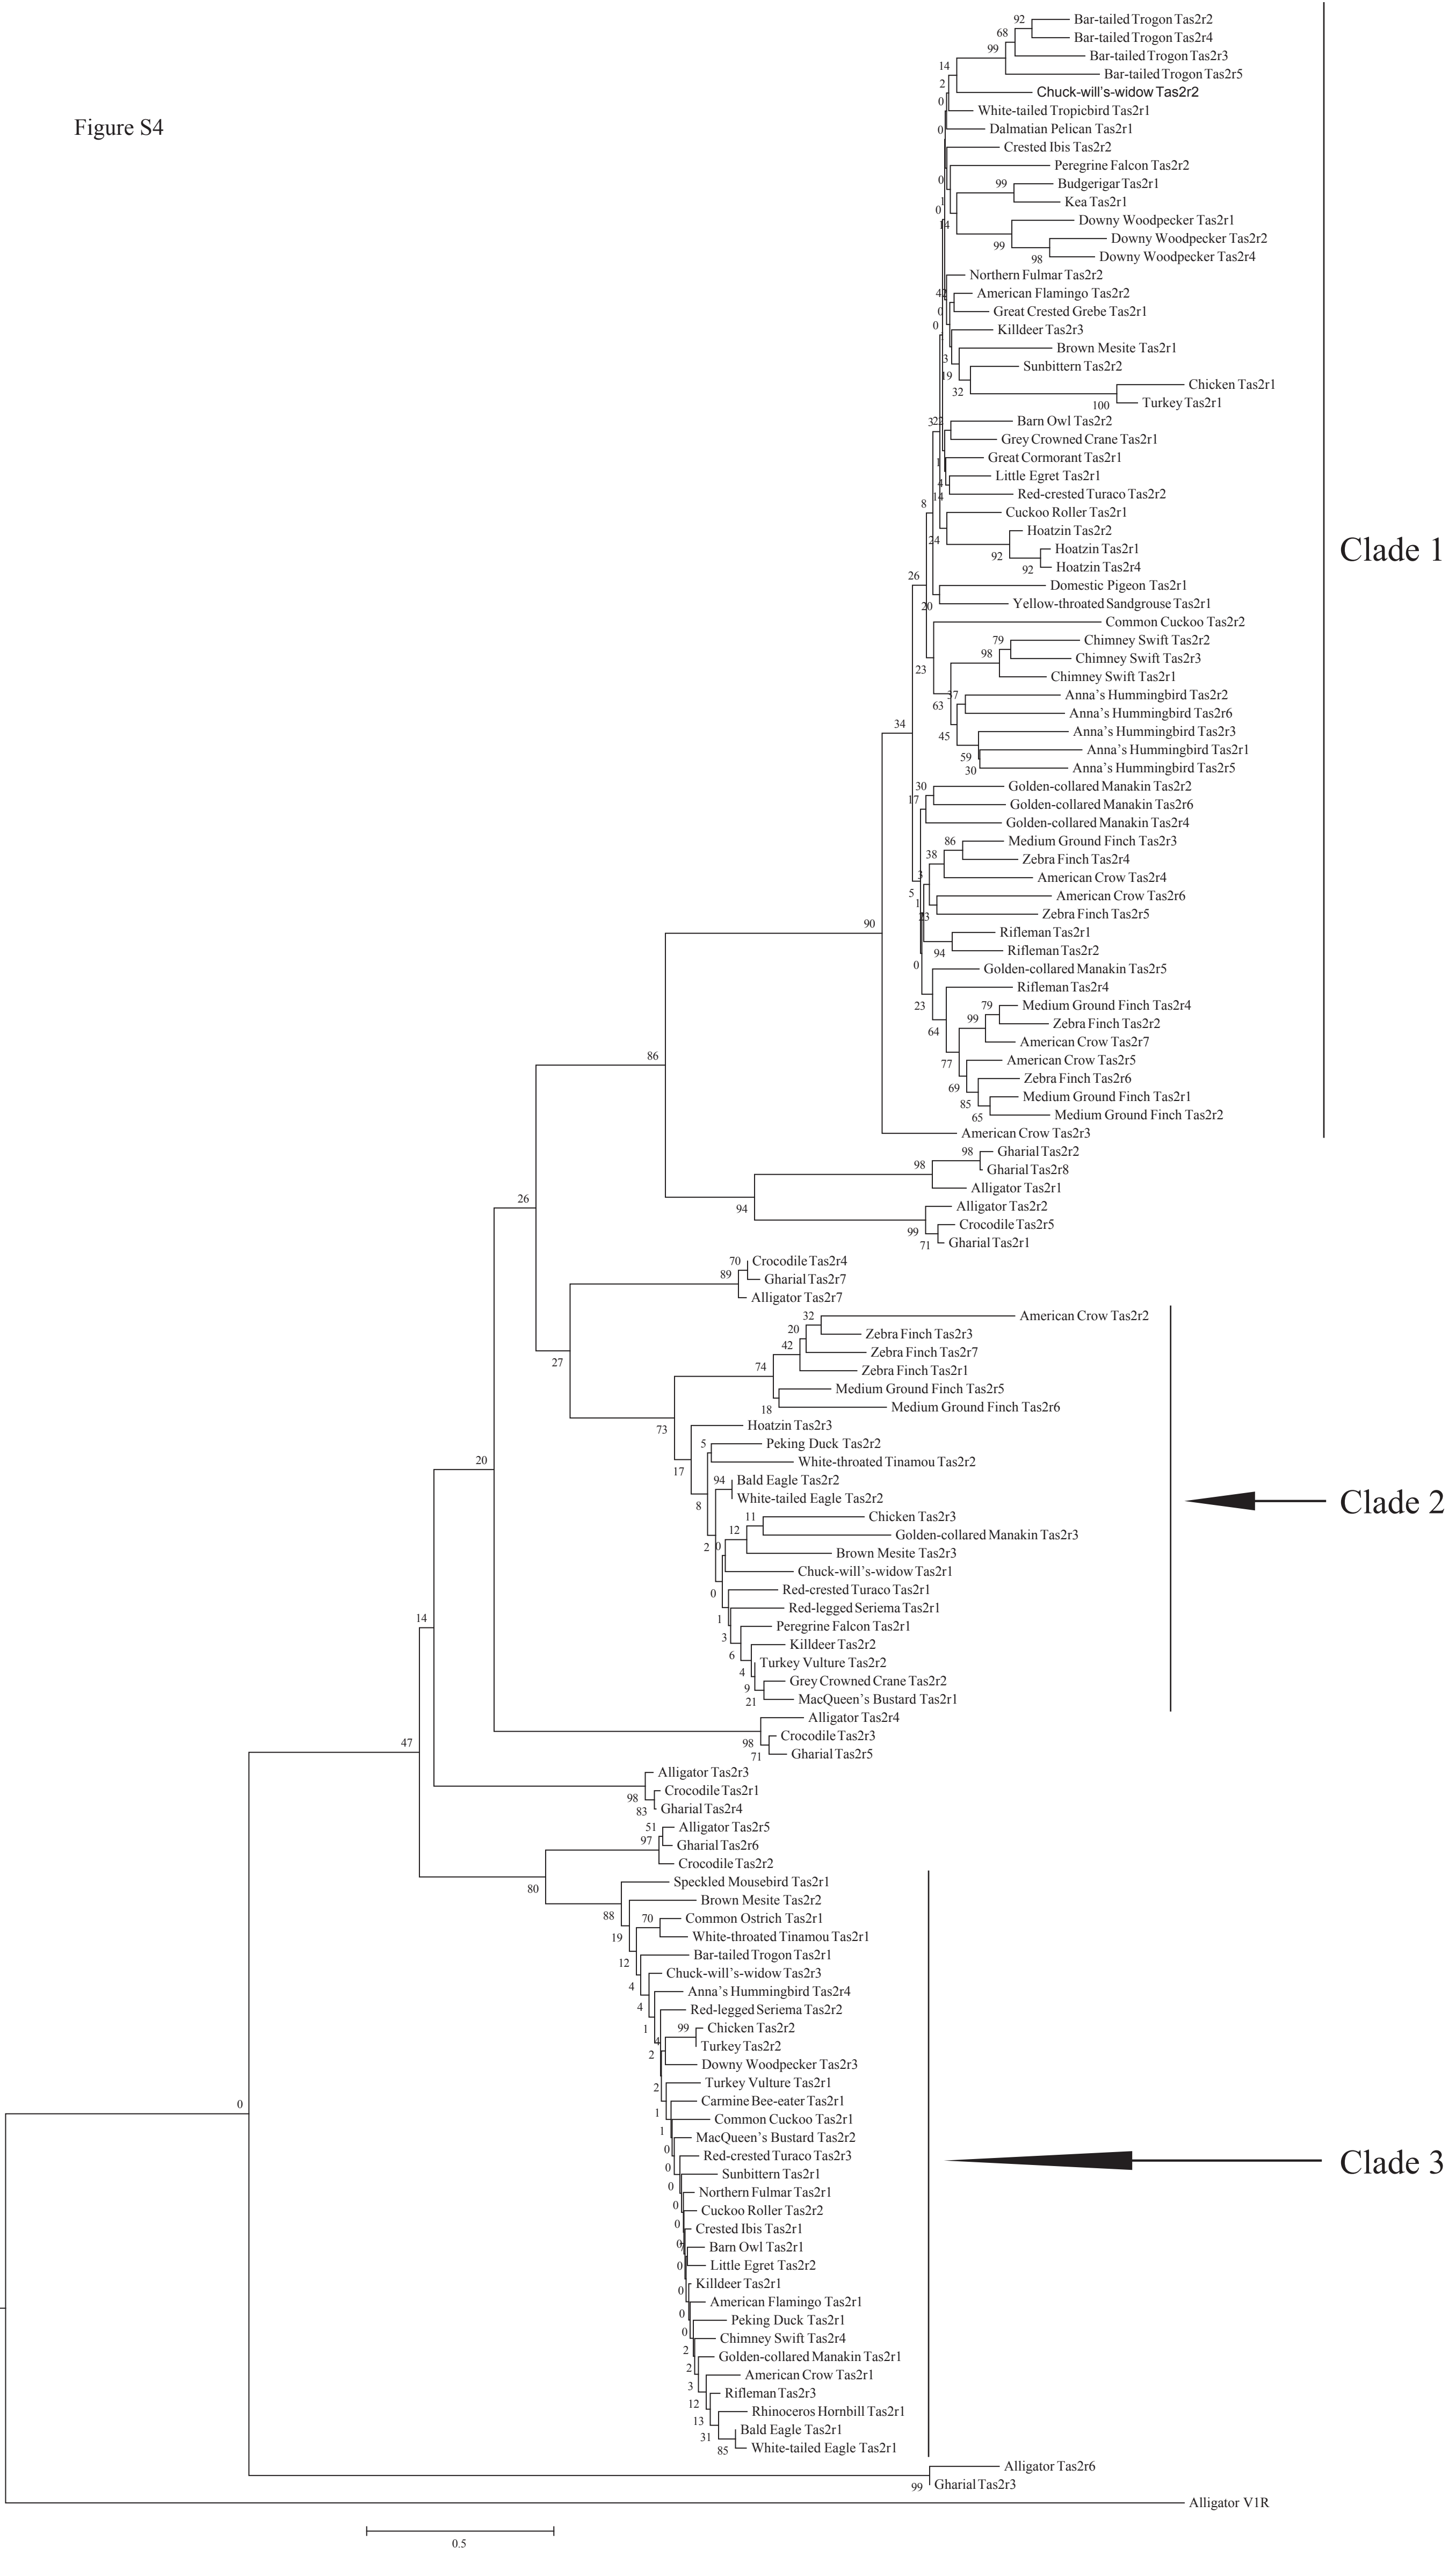

Figure S5

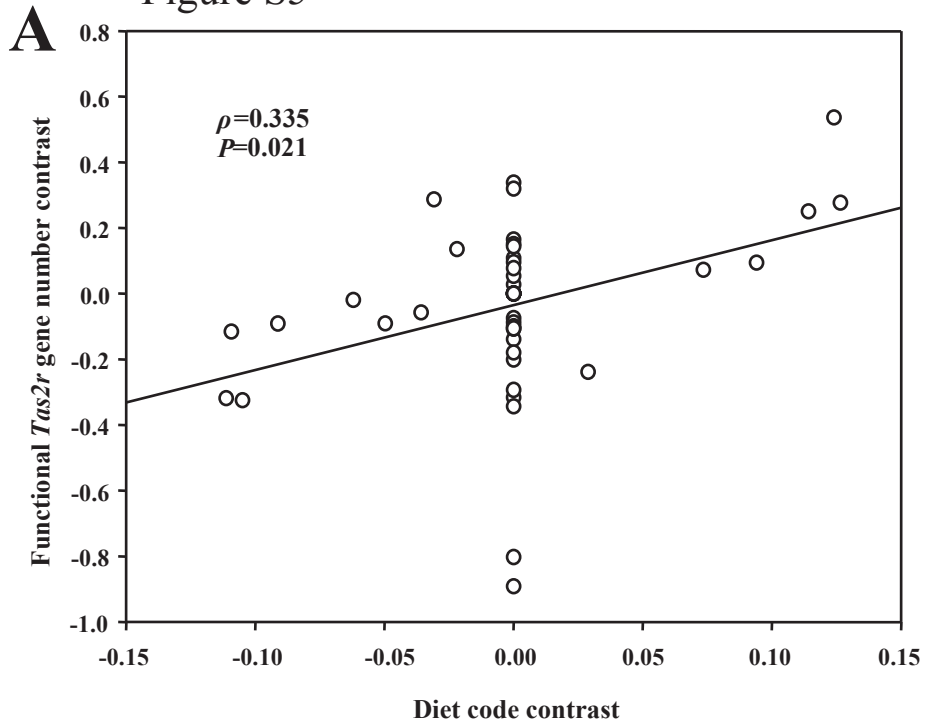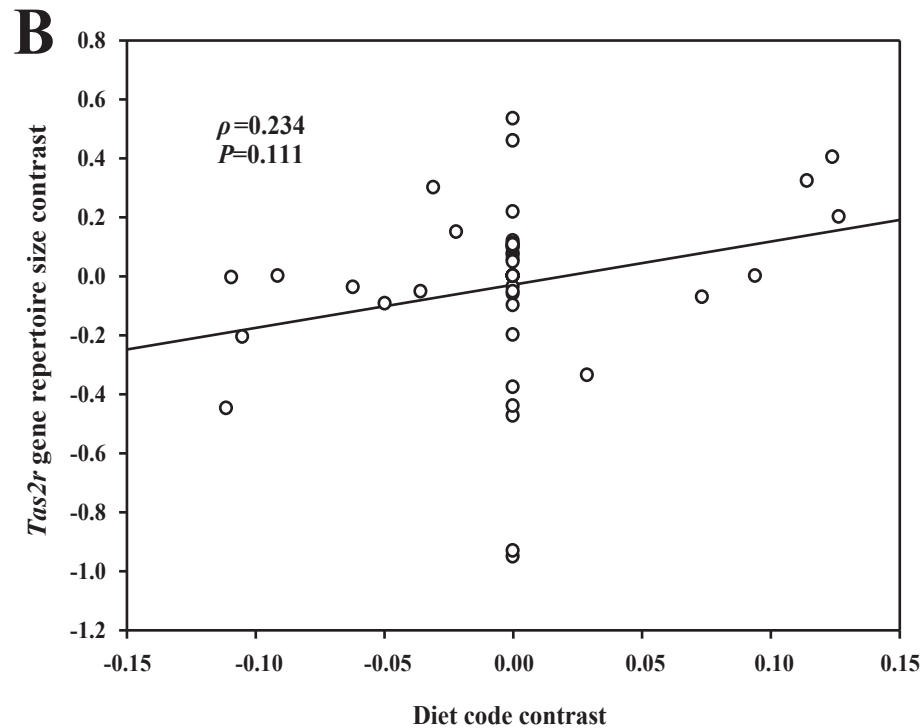

Figure S6

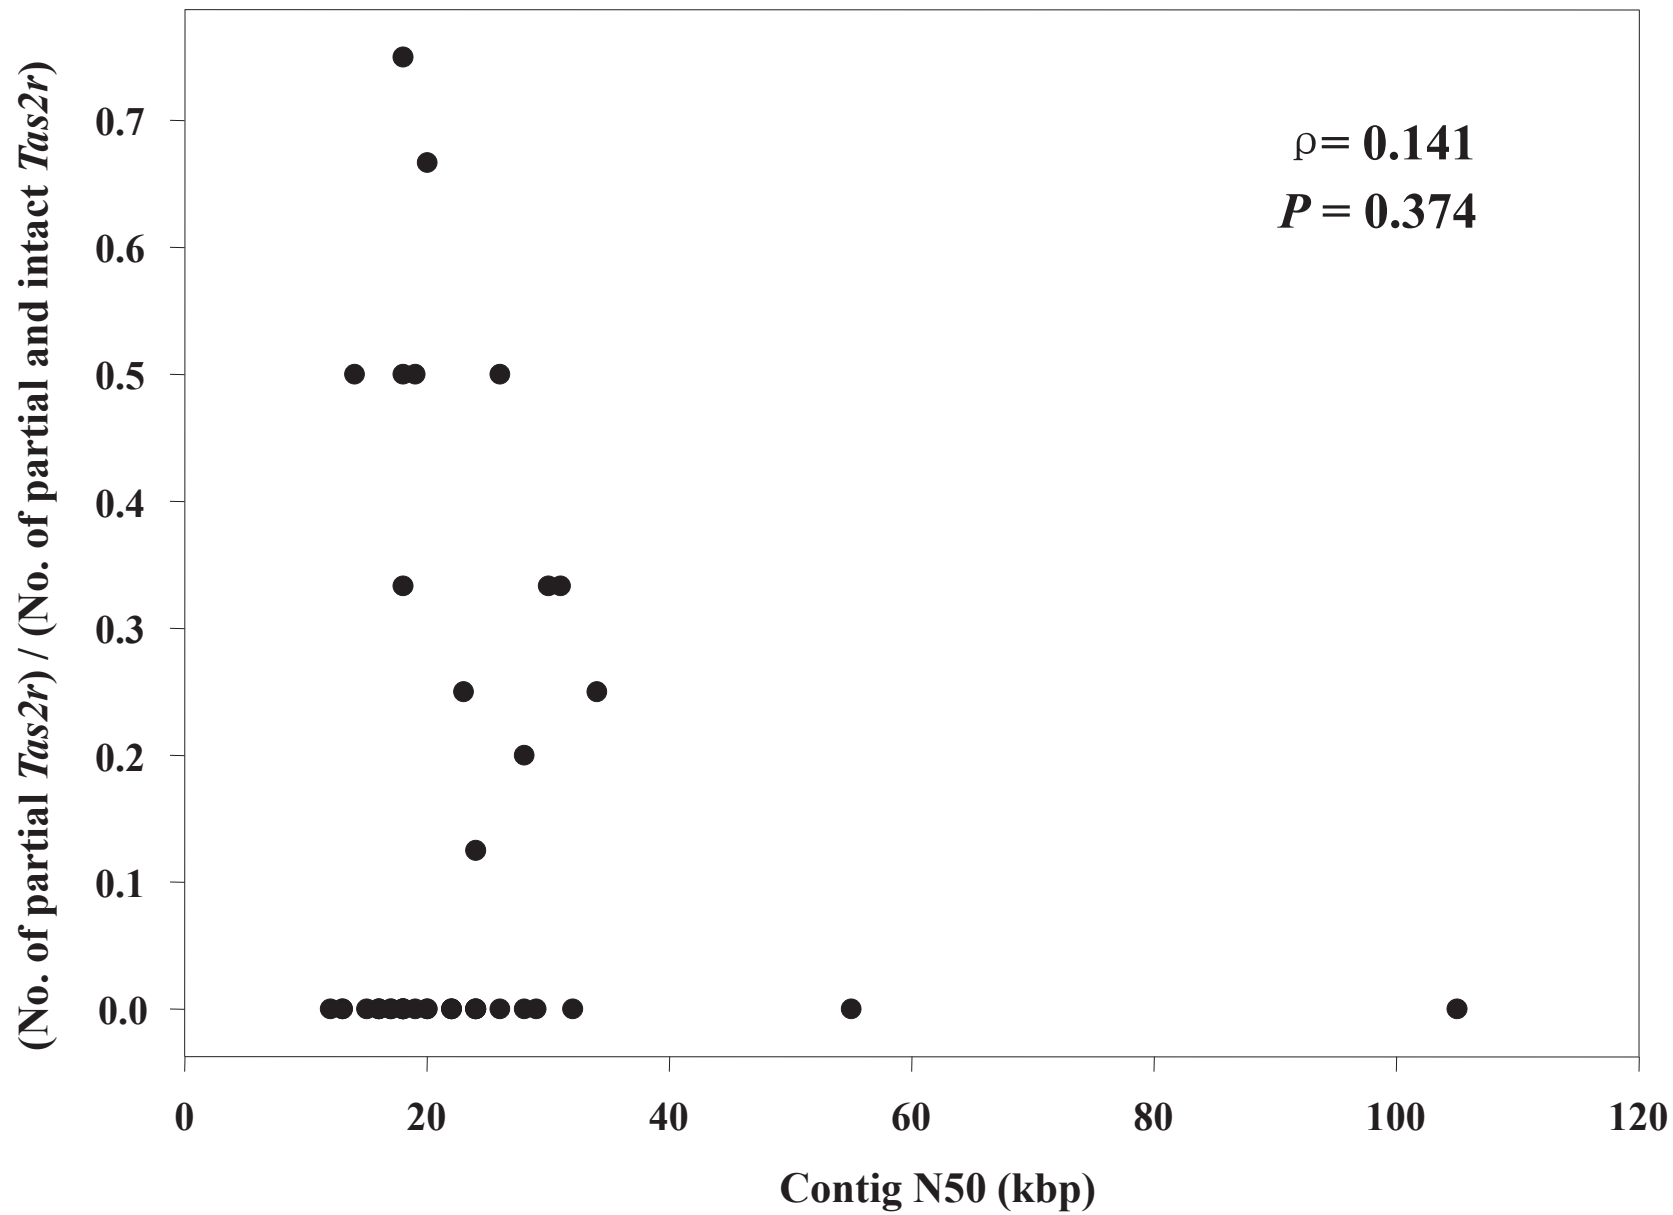

Supplement: supp_evv180_Supplementary_File.pdf [file supp_evv180_Supplementary_File.pdf]
